# Supplementary material
Source: ML conference proceedings conference paper supplement (https://openaccess.thecvf.com/content/WACV2025/html/Bandara_Deep_Metric_Learning_WACV_2025_paper.html)
Supplement: Supplementary file 1 [file Bandara_Deep_Metric_Learning_WACV_2025_supplemental.pdf]

## • Supplementary Material •

# Deep Metric Learning for Unsupervised Remote Sensing Change Detection

### 1. Additional Details on PCC

Polynomial color correction has been originally used in device characterization. In CD, we adopt this concept to map pre-change color space to post-change color space so that resulting difference image  $\mathbf{I}_d$  is less sensitive to isolated radiometric changes in pre-change and post-change images. Suppose that, we have  $N$  color samples from the post-change image, the corresponding camera response  $i_1, i_2, i_3, \dots, i_b$  (where  $b$  is the total number of color bands) can be represented by a  $1 \times b$  vector  $\rho_n$  where  $n = 1, 2, 3, \dots, N$ . If only  $i_1, i_2, i_3, \dots, i_b$  values are utilized in  $\rho_n$ , the transformation between pre-change and post-change is a simple linear transformation. The idea of PCC is that vector  $\rho_n$  can be expanded by adding more terms (i.e.,  $i_1^2, i_2^2, i_3^2, \dots, i_n^2$ ), so that better results can be achieved.

#### 1.1. If pre-change and post-change images have only three-bands (R, G, and B):

If the pre-change and post-change images have only three bands (i.e.,  $b = 3$ , and  $i_1=R, i_2=G, i_3=B$ ), we have following polynomial kernel function  $\rho$ :

$$\rho = [R, G, B, RB, RG, BG, R^2, G^2, B^2, RGB] \quad (1)$$

#### 1.2. If pre-change and post-change images have four or more-bands

If pre-change and post-change images have four bands (i.e.,  $b = 4$ , and  $i_1=R, i_2=G, i_3=B, i_4=Y$ ), we have following polynomial kernel function  $\rho$ :

$$\rho = [R, G, B, Y, RG, RB, RY, GB, GY, BY, R^2, G^2, B^2, Y^2, RGB, RGY, RBY, GBY, RGBY] \quad (2)$$

For pre-change and post-change images having more than four bands ( $b > 4$ ), we consider polynomial terms up to third order to construct the kernel function considering the computational complexity of PCC.

### 1.3. Additional PCC results on OSCD dataset.

Figure 1, shows additional qualitative results on PCC on OSCD dataset [1]. From the figure we can observe that how well the polynomial correction transforms pre-change image color space in to the post-change color space via polynomial regression. This procedure greatly reduces the isolated colorimetric changes between pre-change and post-change images. Therefore, the resulting difference image  $\mathbf{I}_d$  is less sensitive to the color shifts between pre-change and post-change images.

### 2. How our “Deep Metric Learning CD” algorithm converges to optimum solution

Figure 2, 3, 4, 5, 6, and 7 depict given a pre-change and post-change image pair  $\{\mathbf{I}_1, \mathbf{I}_2\}$ , how our proposed algorithm finds the change probability map  $\mathbf{P}_c$ . Our algorithm takes difference image  $\mathbf{I}_d$  as input and process it through a Deep-Change Probability Generator (D-CPG) to generate the change probability map  $\mathbf{P}_c$ . The change probability map  $\mathbf{P}_c$  is used to calculate the the proposed unsupervised loss for CD  $\mathcal{L}_{CD}$ . We iteratively minimize  $\mathcal{L}_{CD}$  to find the optimal change probability map  $\mathcal{P}_c^*$  during the optimization process. Finally, we threshold  $\mathbf{P}_c^*$  with an appropriate probability value to obtain binary change map.

### 3. Additional Qualitative Results on OSCD dataset

Figure 8, 9, 10, and 7 shows the final change probability map (i.e., difference image) correspond to different SOTA methods on OSCD dataset.

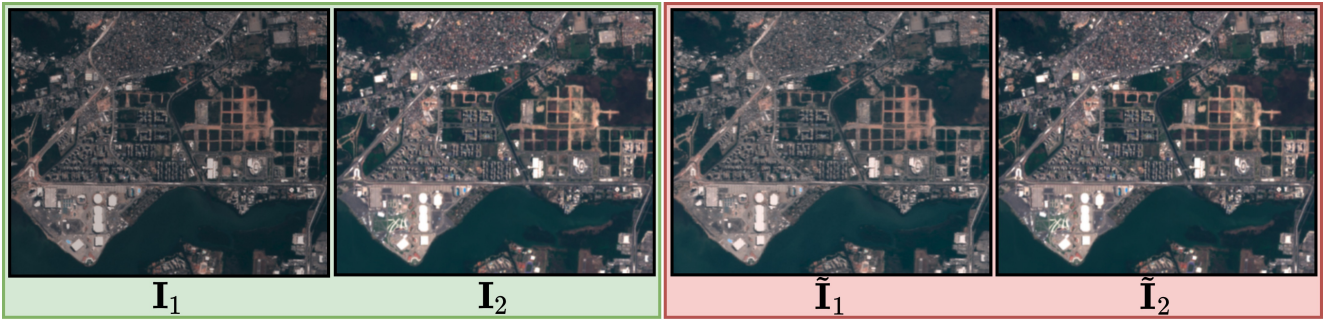

(a) Before PCC

(b) After PCC

**Figure 1.** Additional qualitative examples on OSCD dataset [1] to illustrate how PCC maps pre-change image color space to post-change image color space using polynomial regression.

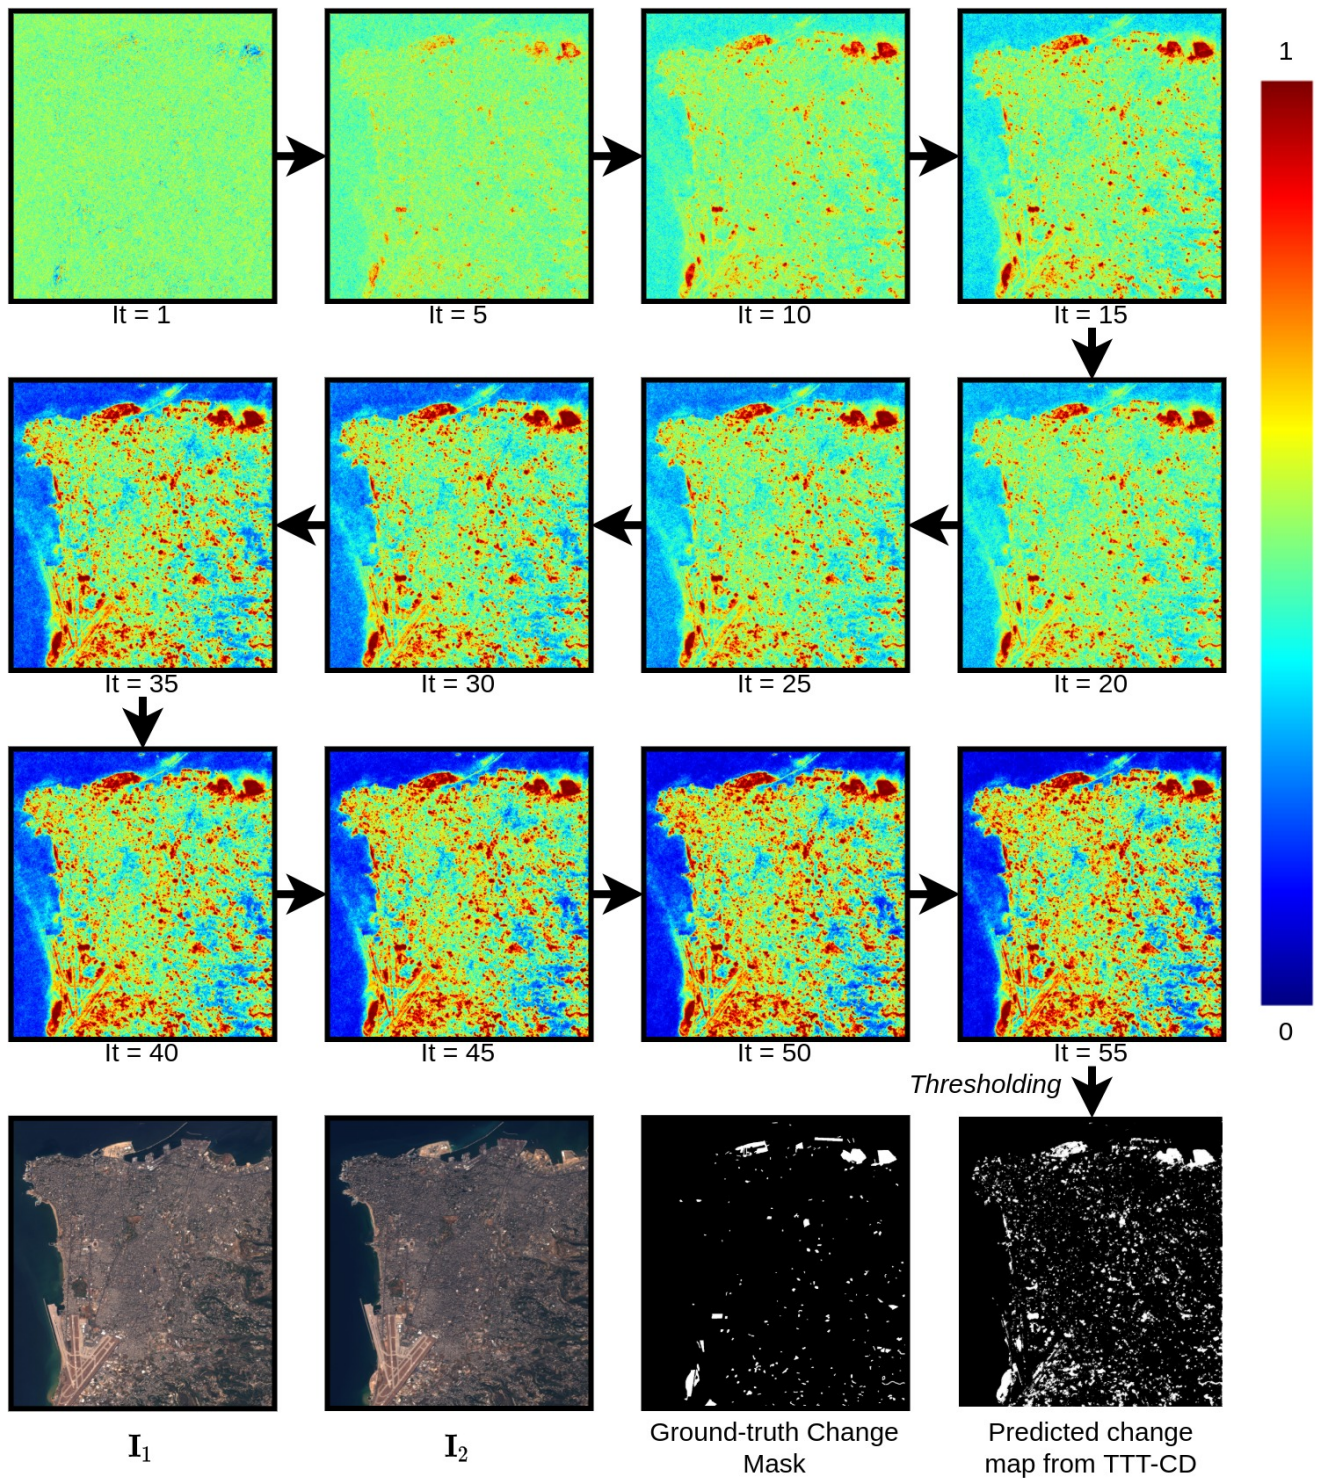

**Figure 2.** An example on "beirut" image in OSCD dataset.

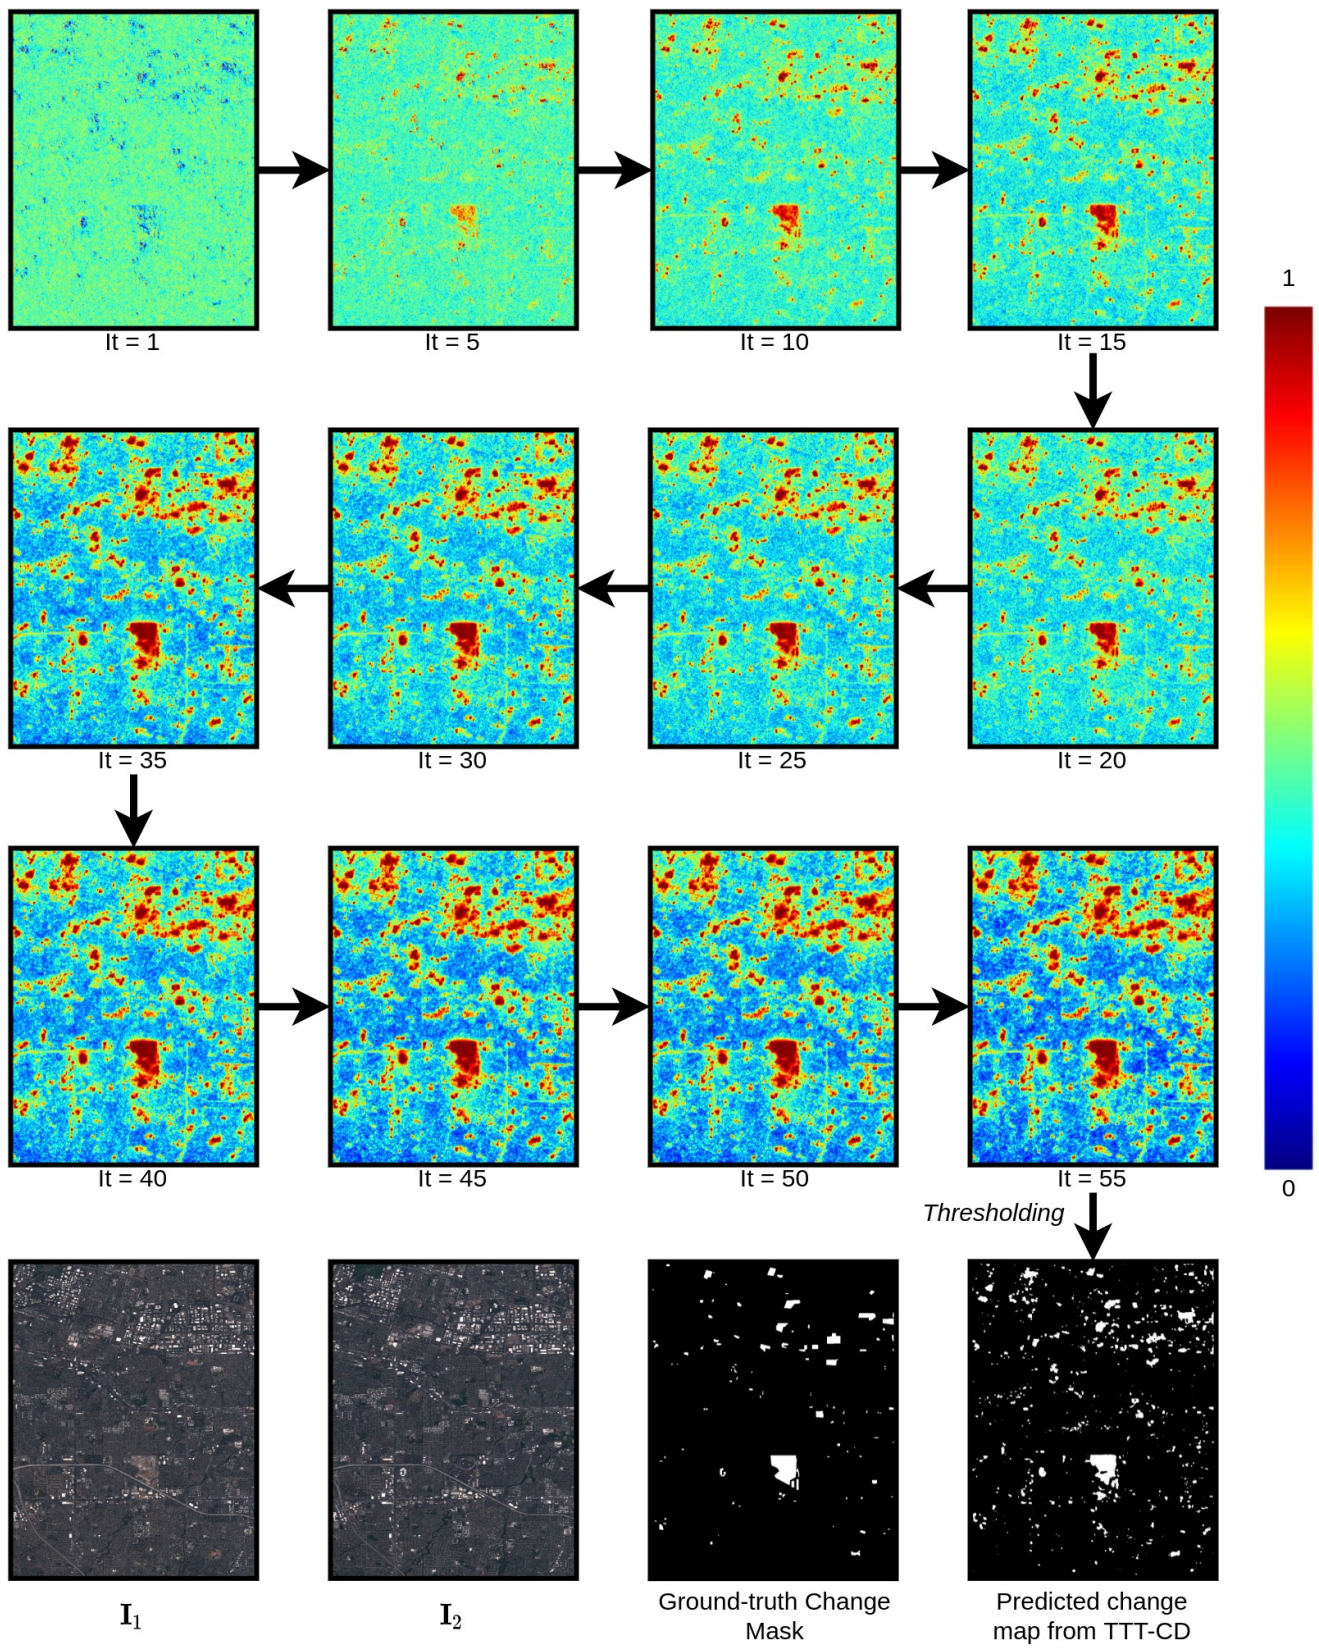

**Figure 3.** An example on "cupertino" image in OSCD dataset.

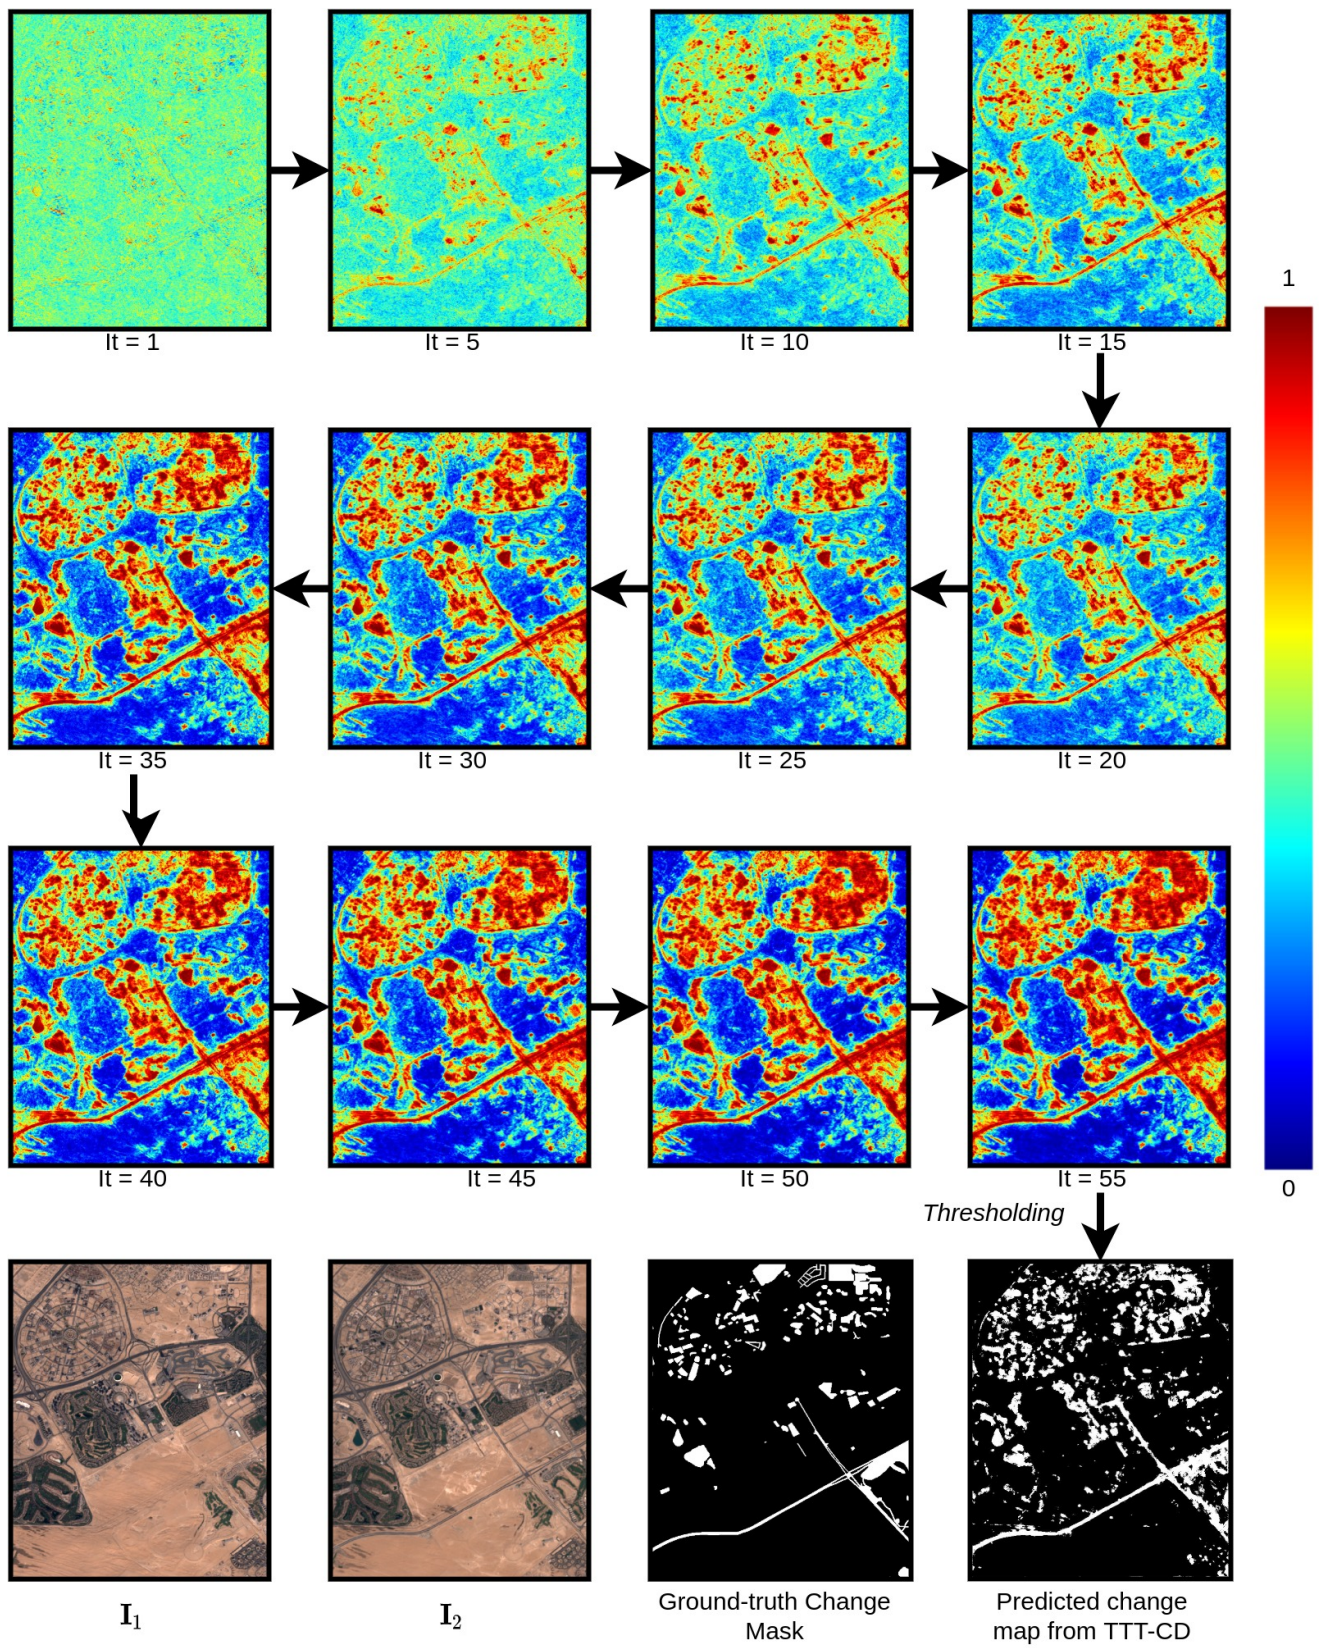

**Figure 4.** An example on “cupertino” image in OSCD dataset.

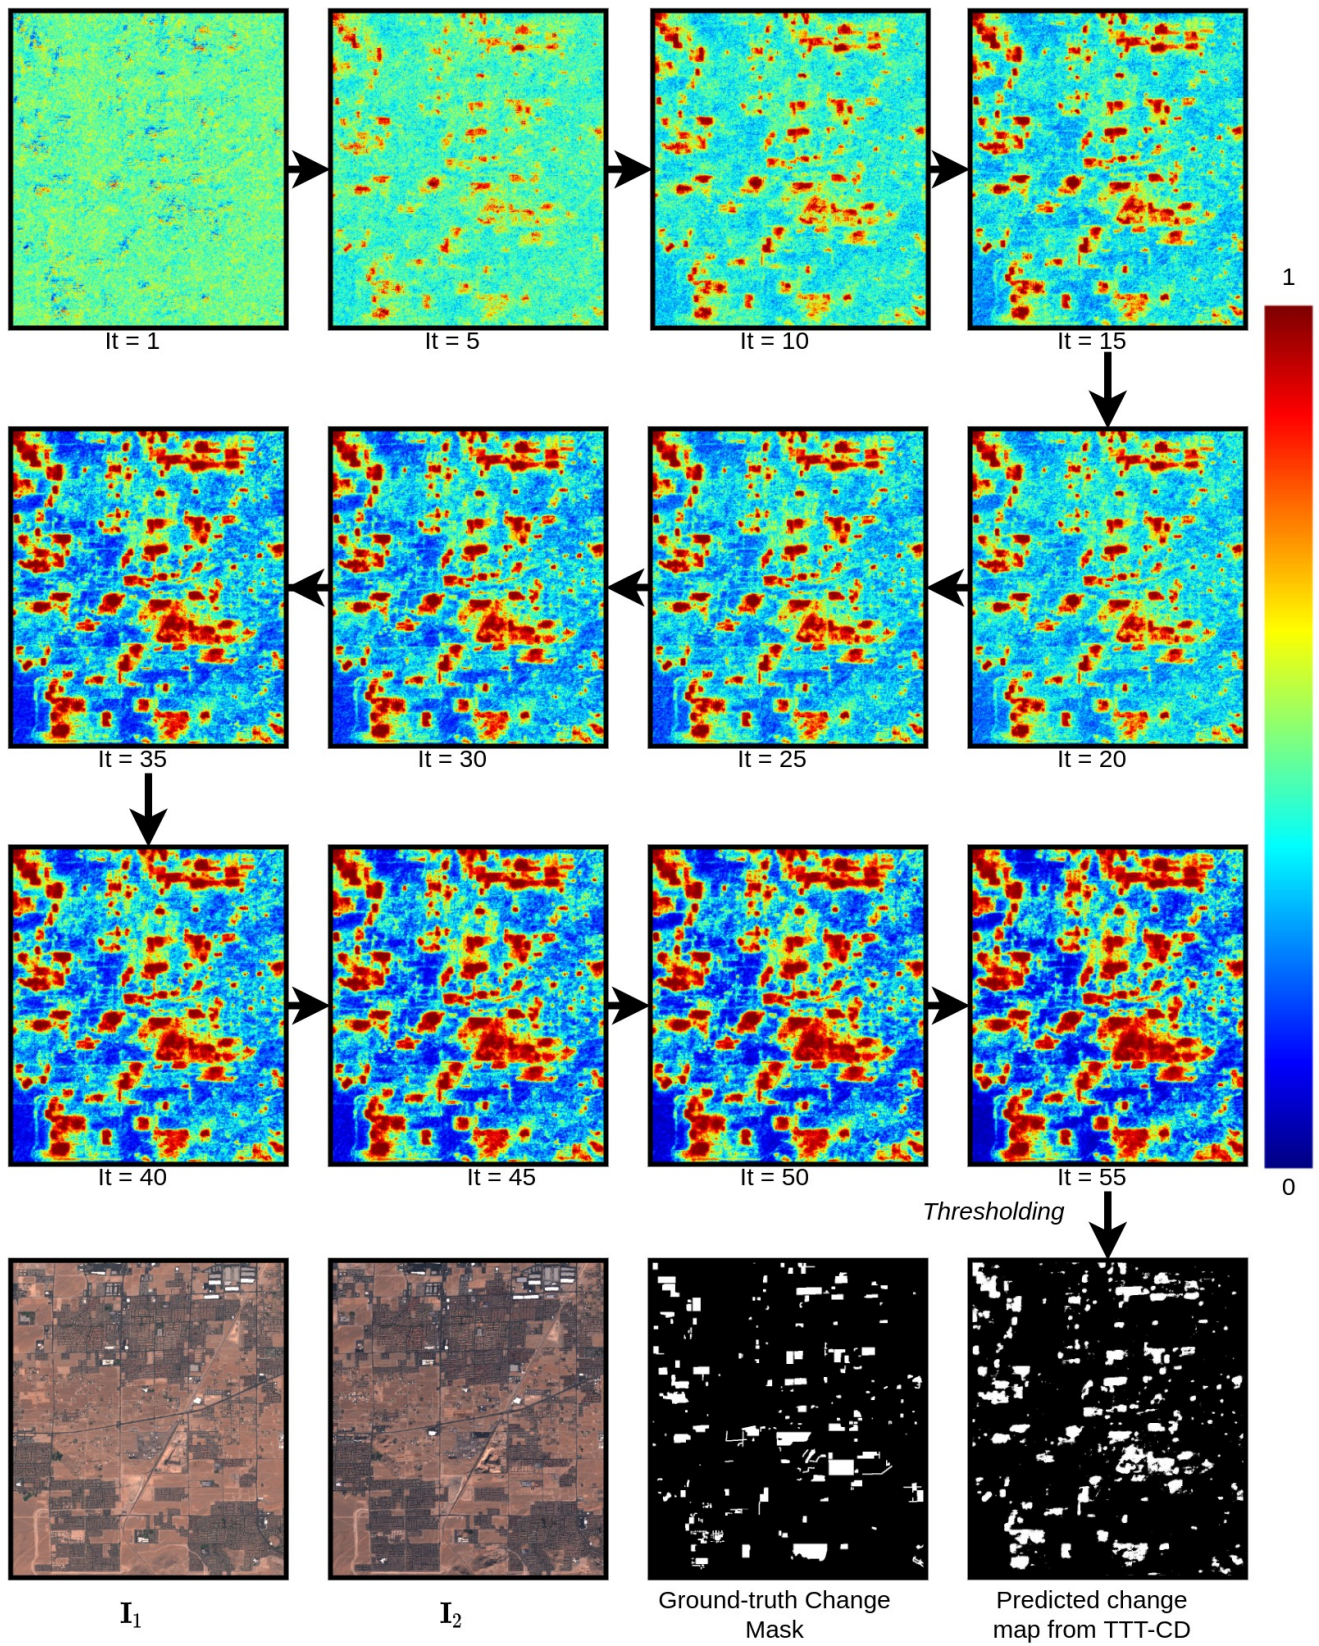

Figure 5. An example on "lasvegas" image in OSCD dataset.

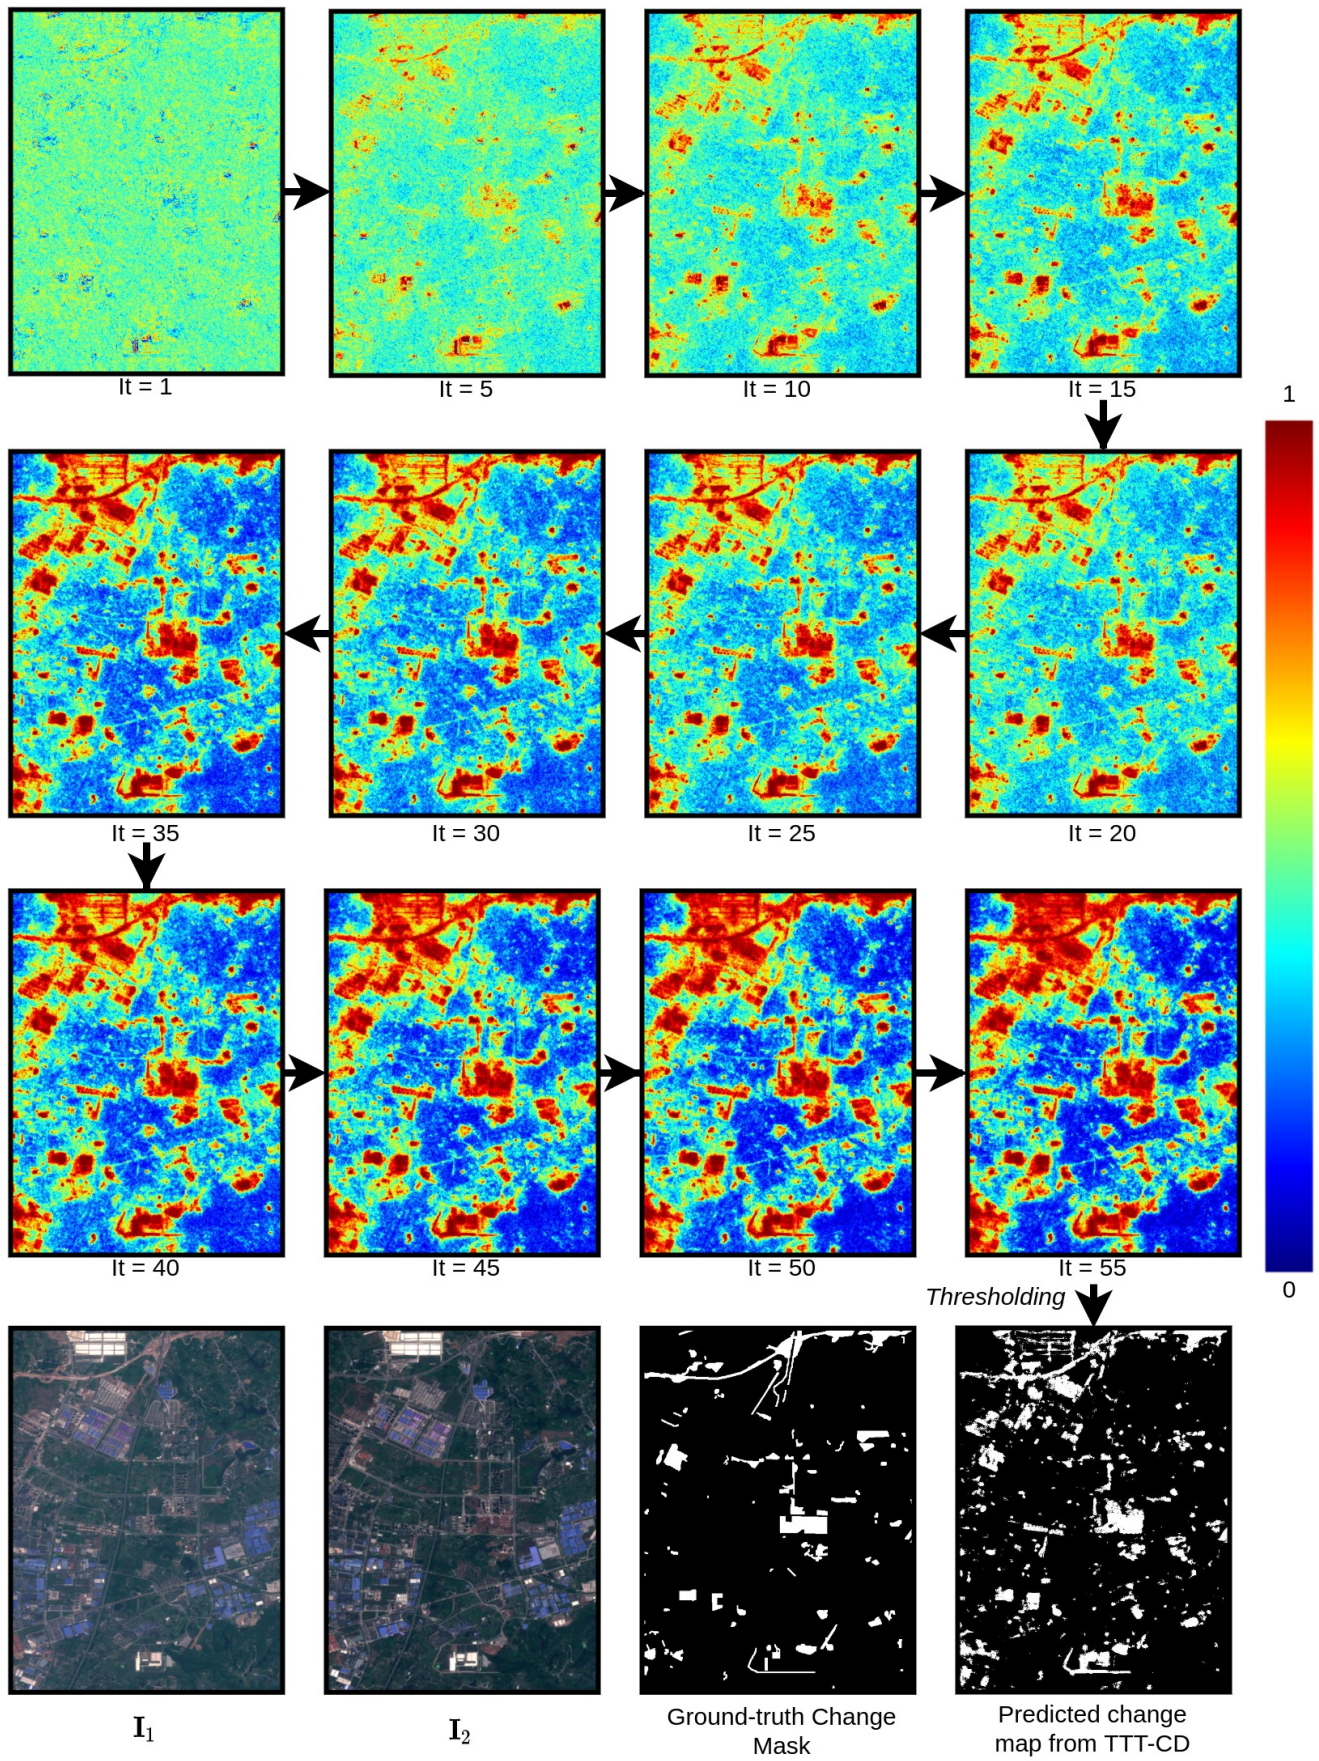

**Figure 6.** An example on "lasvegas" image in OSCD dataset.

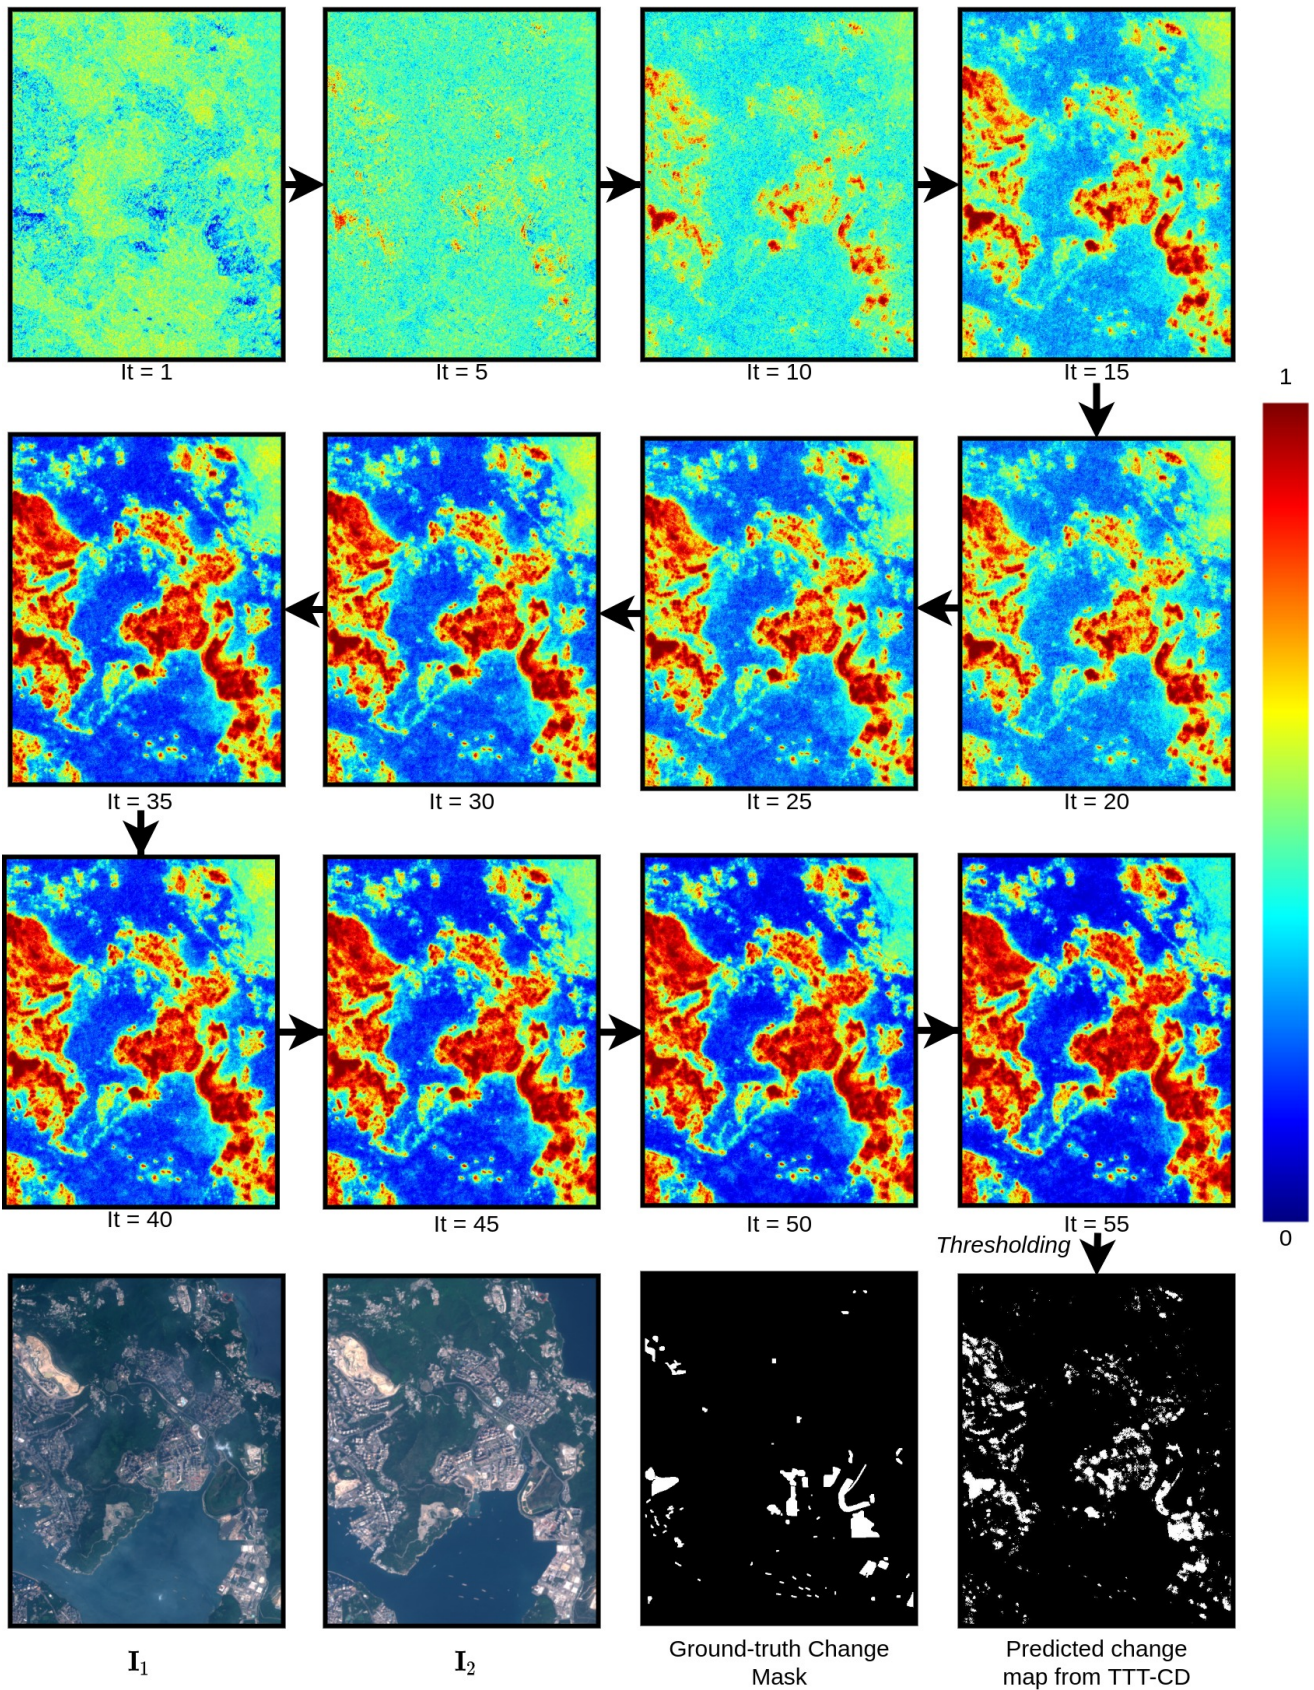

Figure 7. An example on “hongkong” image in OSCD dataset.



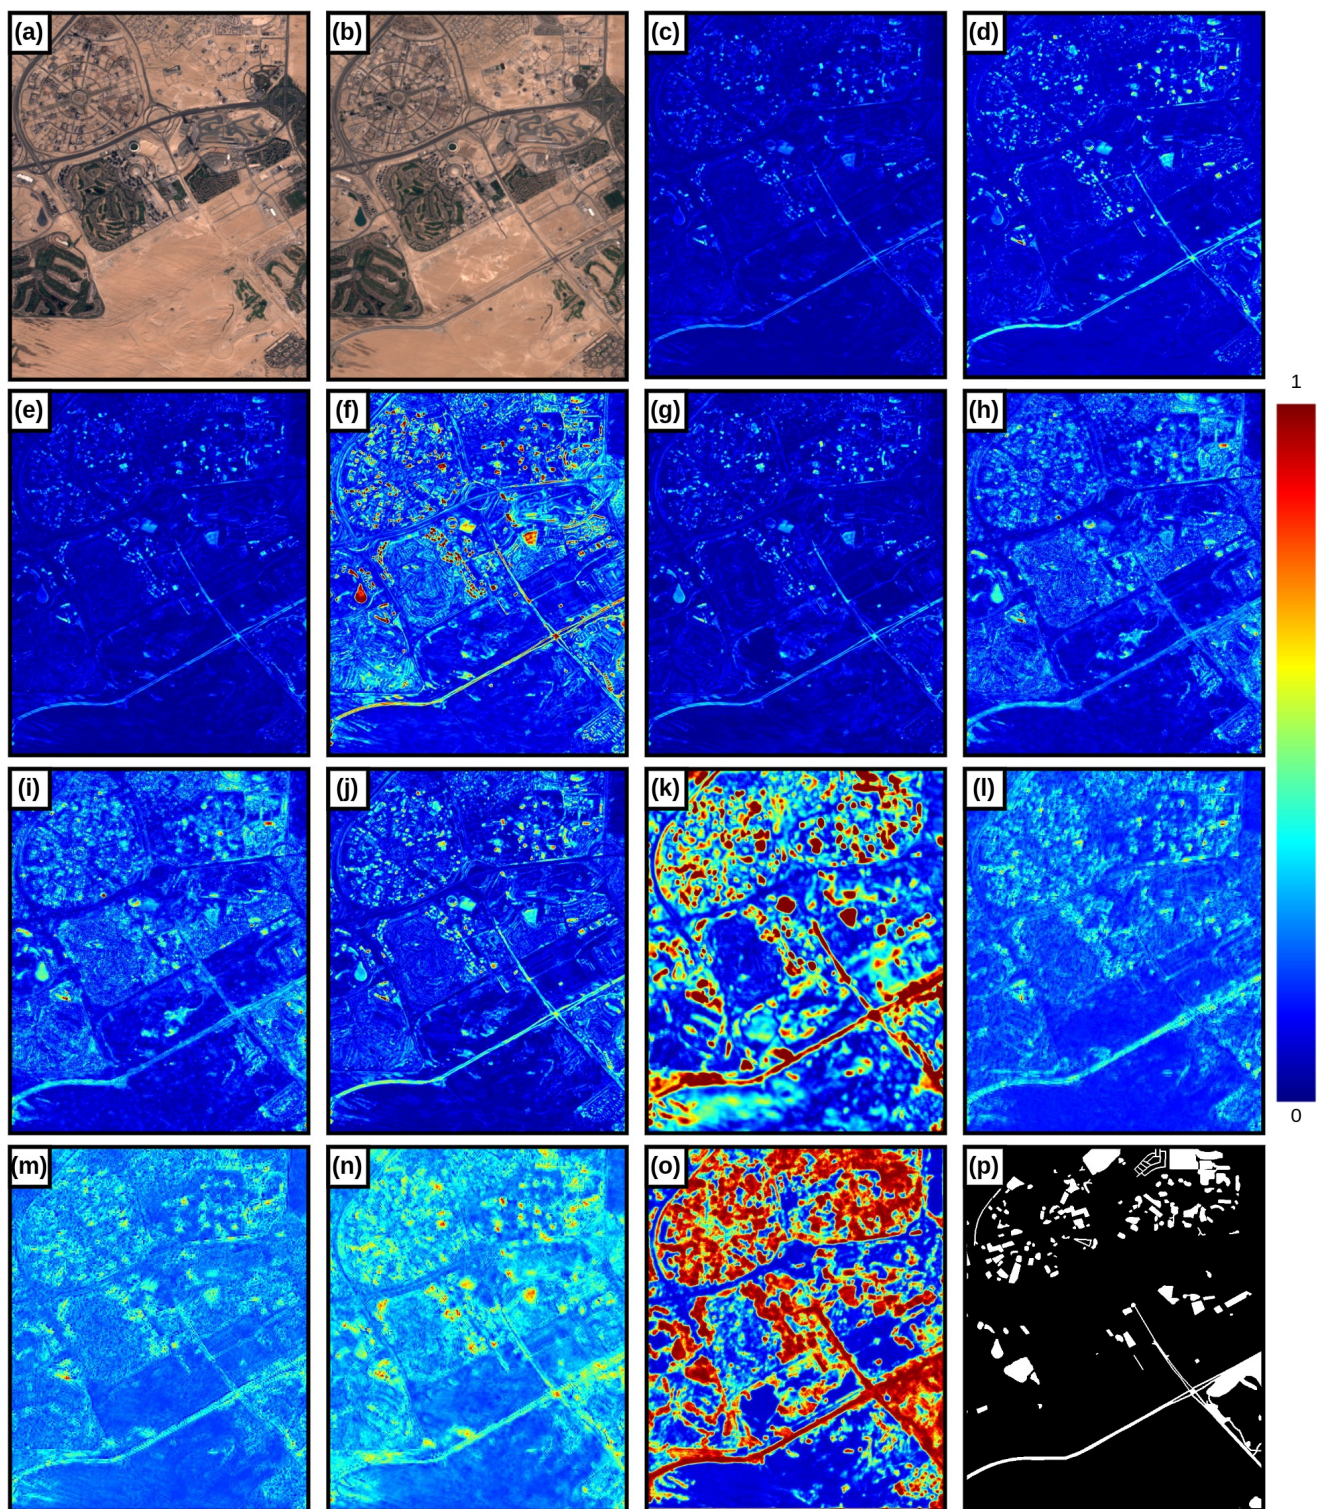

**Figure 8.** Change probability map (i.e., difference image) of different CD methods for dubai image pair in OSCD dataset. (a) Pre-change image. (b) Post-change image. (c) CVA. (d) DPCA. (e) ImageDiff. (f) ImageRatio. (g) ImageRegr. (h) IRMAD. (i) MAD. (j) PCDA. (k) DeepCVA. (l) UNet. (m) SeCo-Rand. (n) SeCo-Pre. (o) “Deep metric learning CD” (ours). (p) Groud-truth change mask.

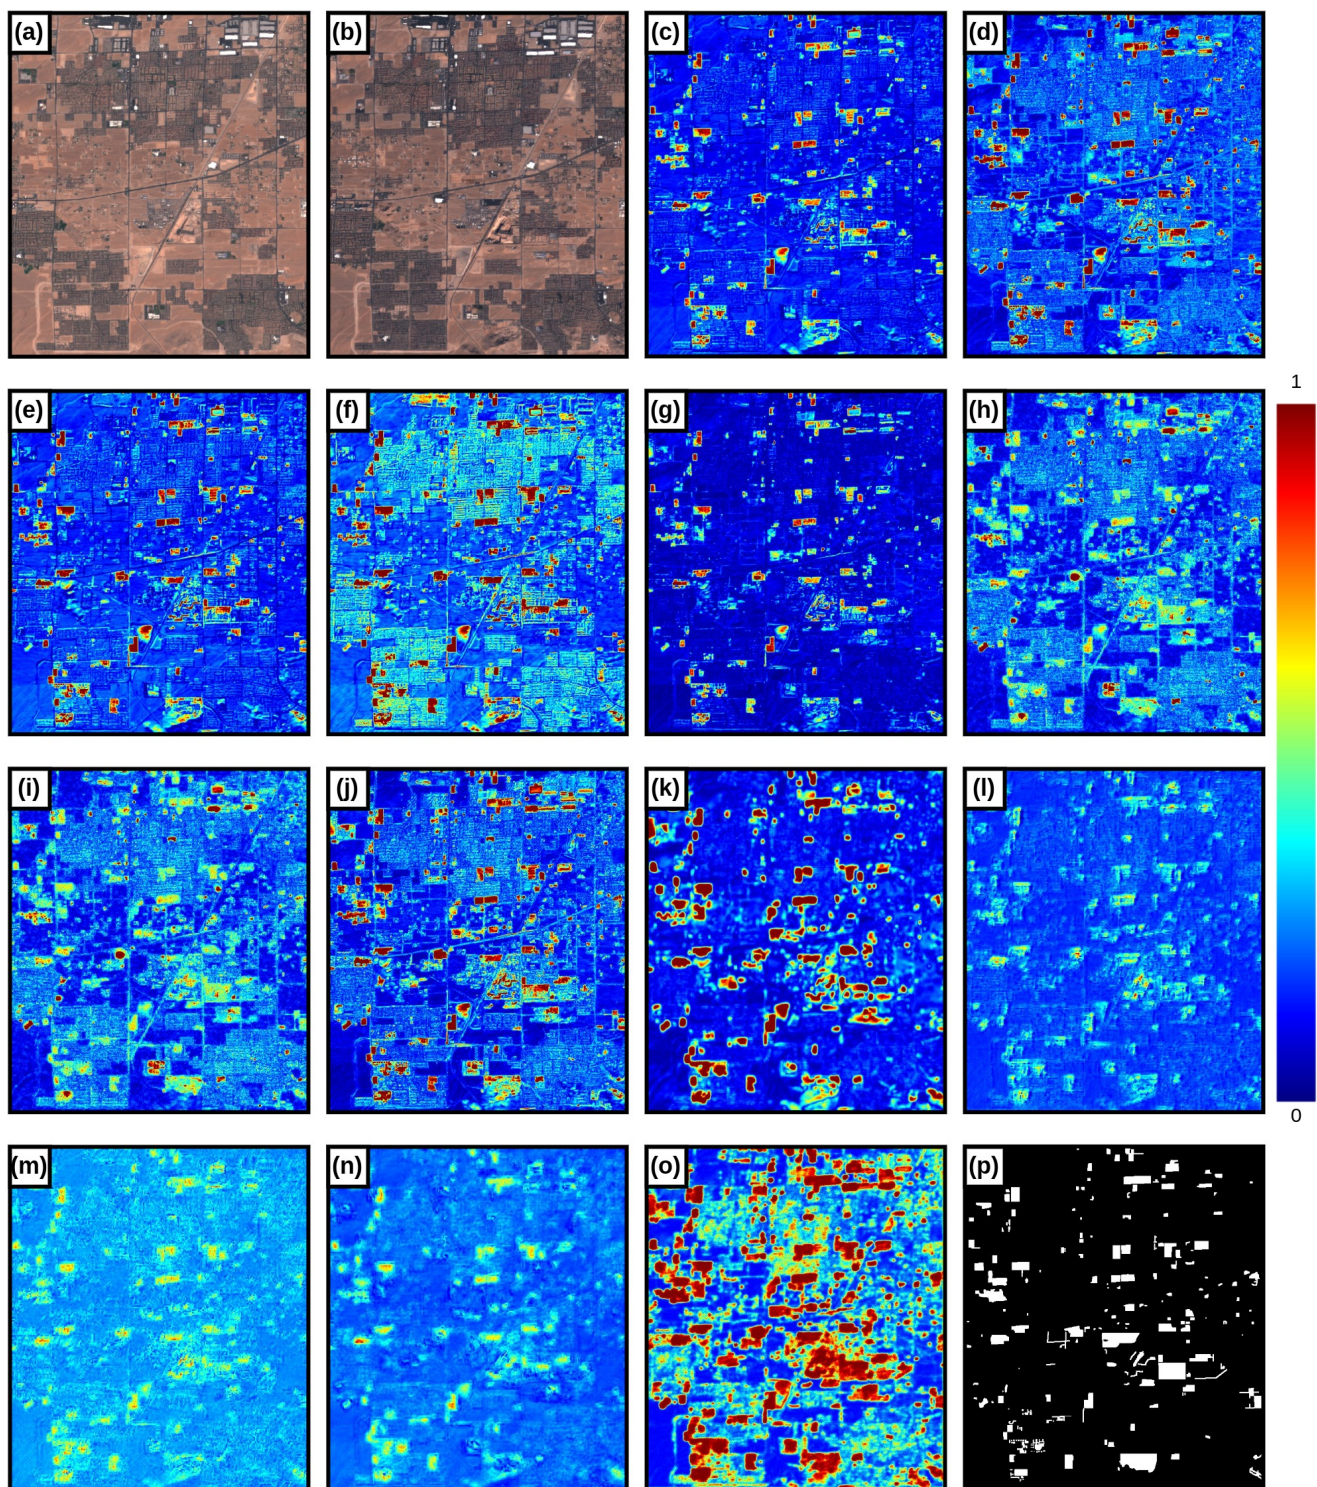

**Figure 9.** Change probability map (i.e., difference image) of different CD methods for lasvegas image pair in OSCD dataset. (a) Pre-change image. (b) Post-change image. (c) CVA. (d) DPCA. (e) ImageDiff. (f) ImageRatio. (g) ImageRegr. (h) IRMAD. (i) MAD. (j) PCDA. (k) DeepCVA. (l) UNet. (m) SeCo-Rand. (n) SeCo-Pre. (o) “Deep metric learning CD” (ours). (p) Groud-truth change mask.

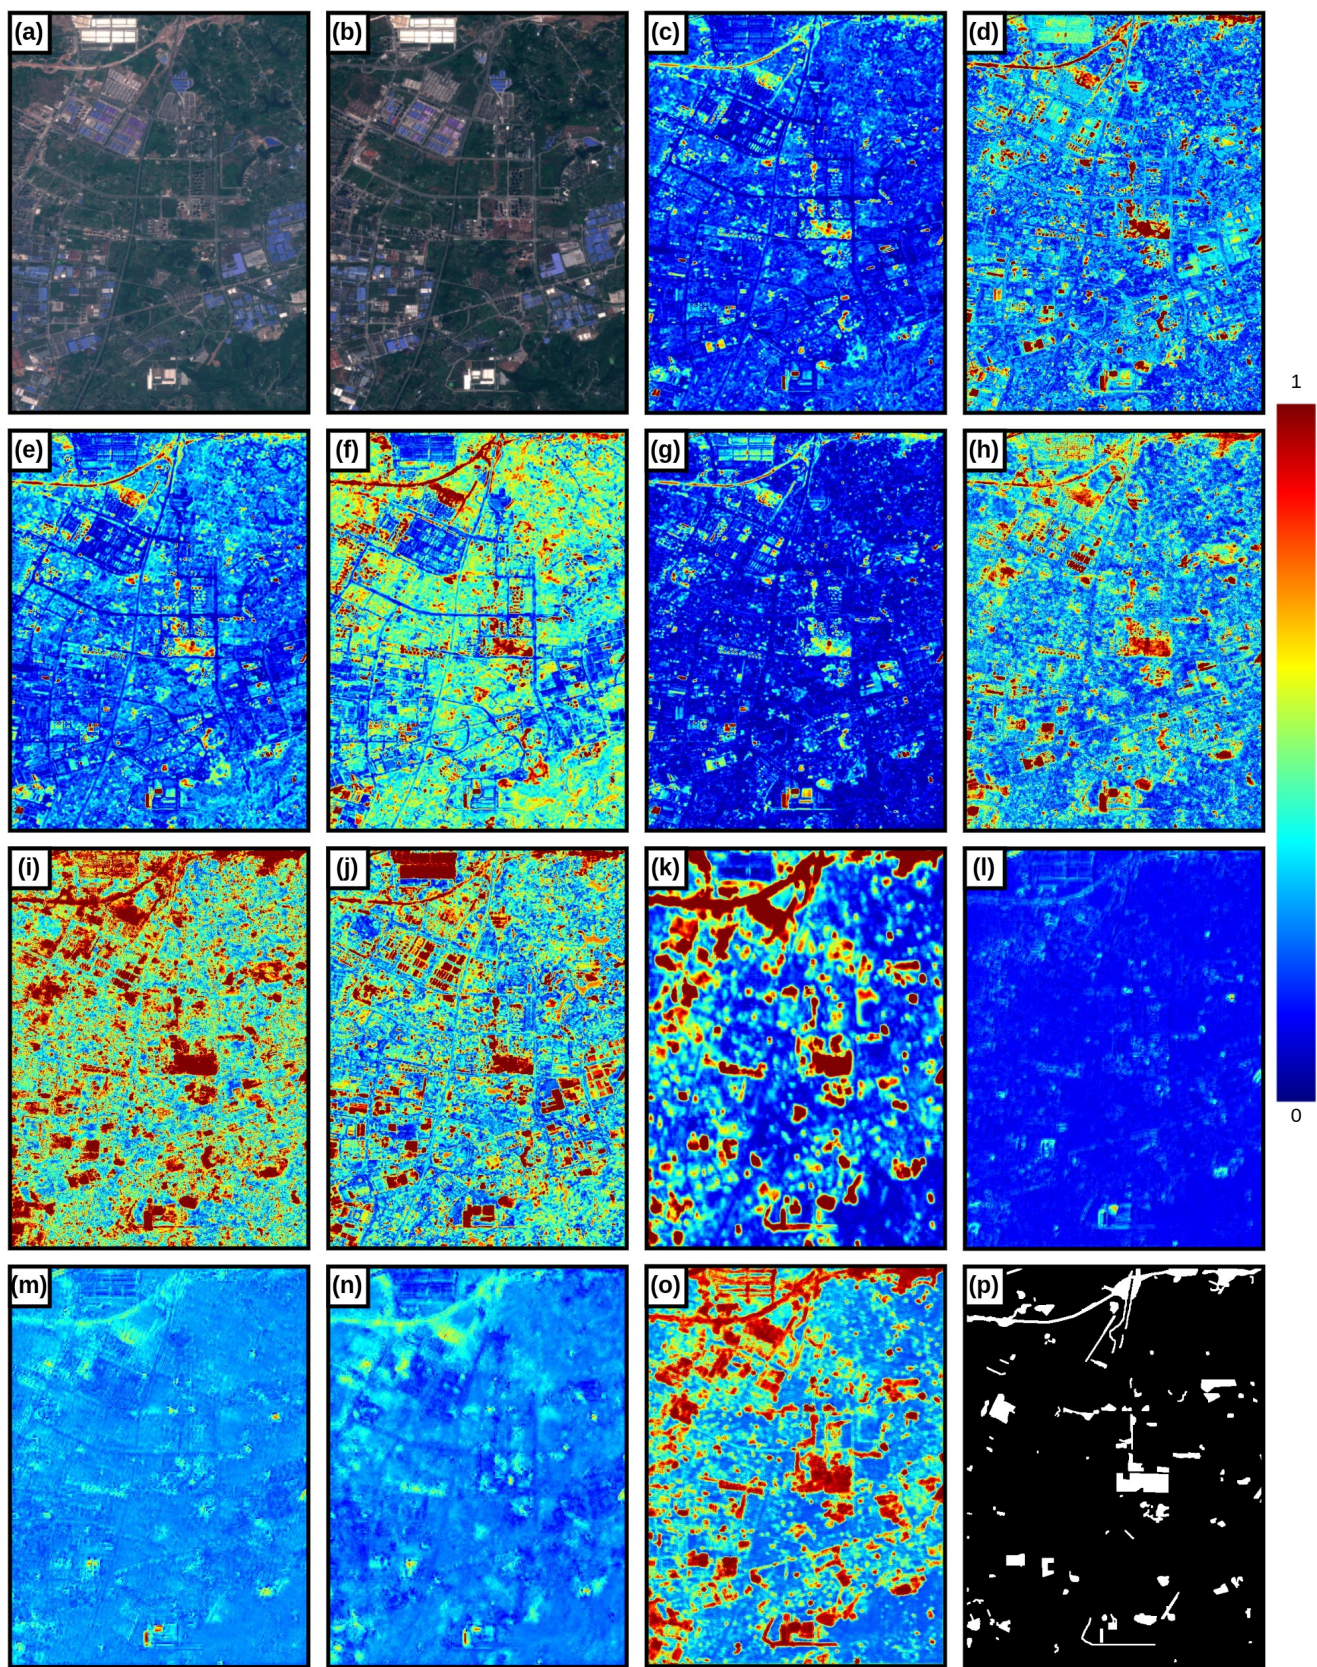

**Figure 10.** Change probability map (i.e., difference image) of different CD methods for chongqing image pair in OSCD dataset. (a) Pre-change image. (b) Post-change image. (c) CVA. (d) DPCA. (e) ImageDiff. (f) ImageRatio. (g) ImageRegr. (h) IRMAD. (i) MAD. (j) PCDA. (k) DeepCVA. (l) UNet. (m) SeCo-Rand. (n) SeCo-Pre. (o) “Deep metric learning CD” (ours). (p) Groud-truth change mask.

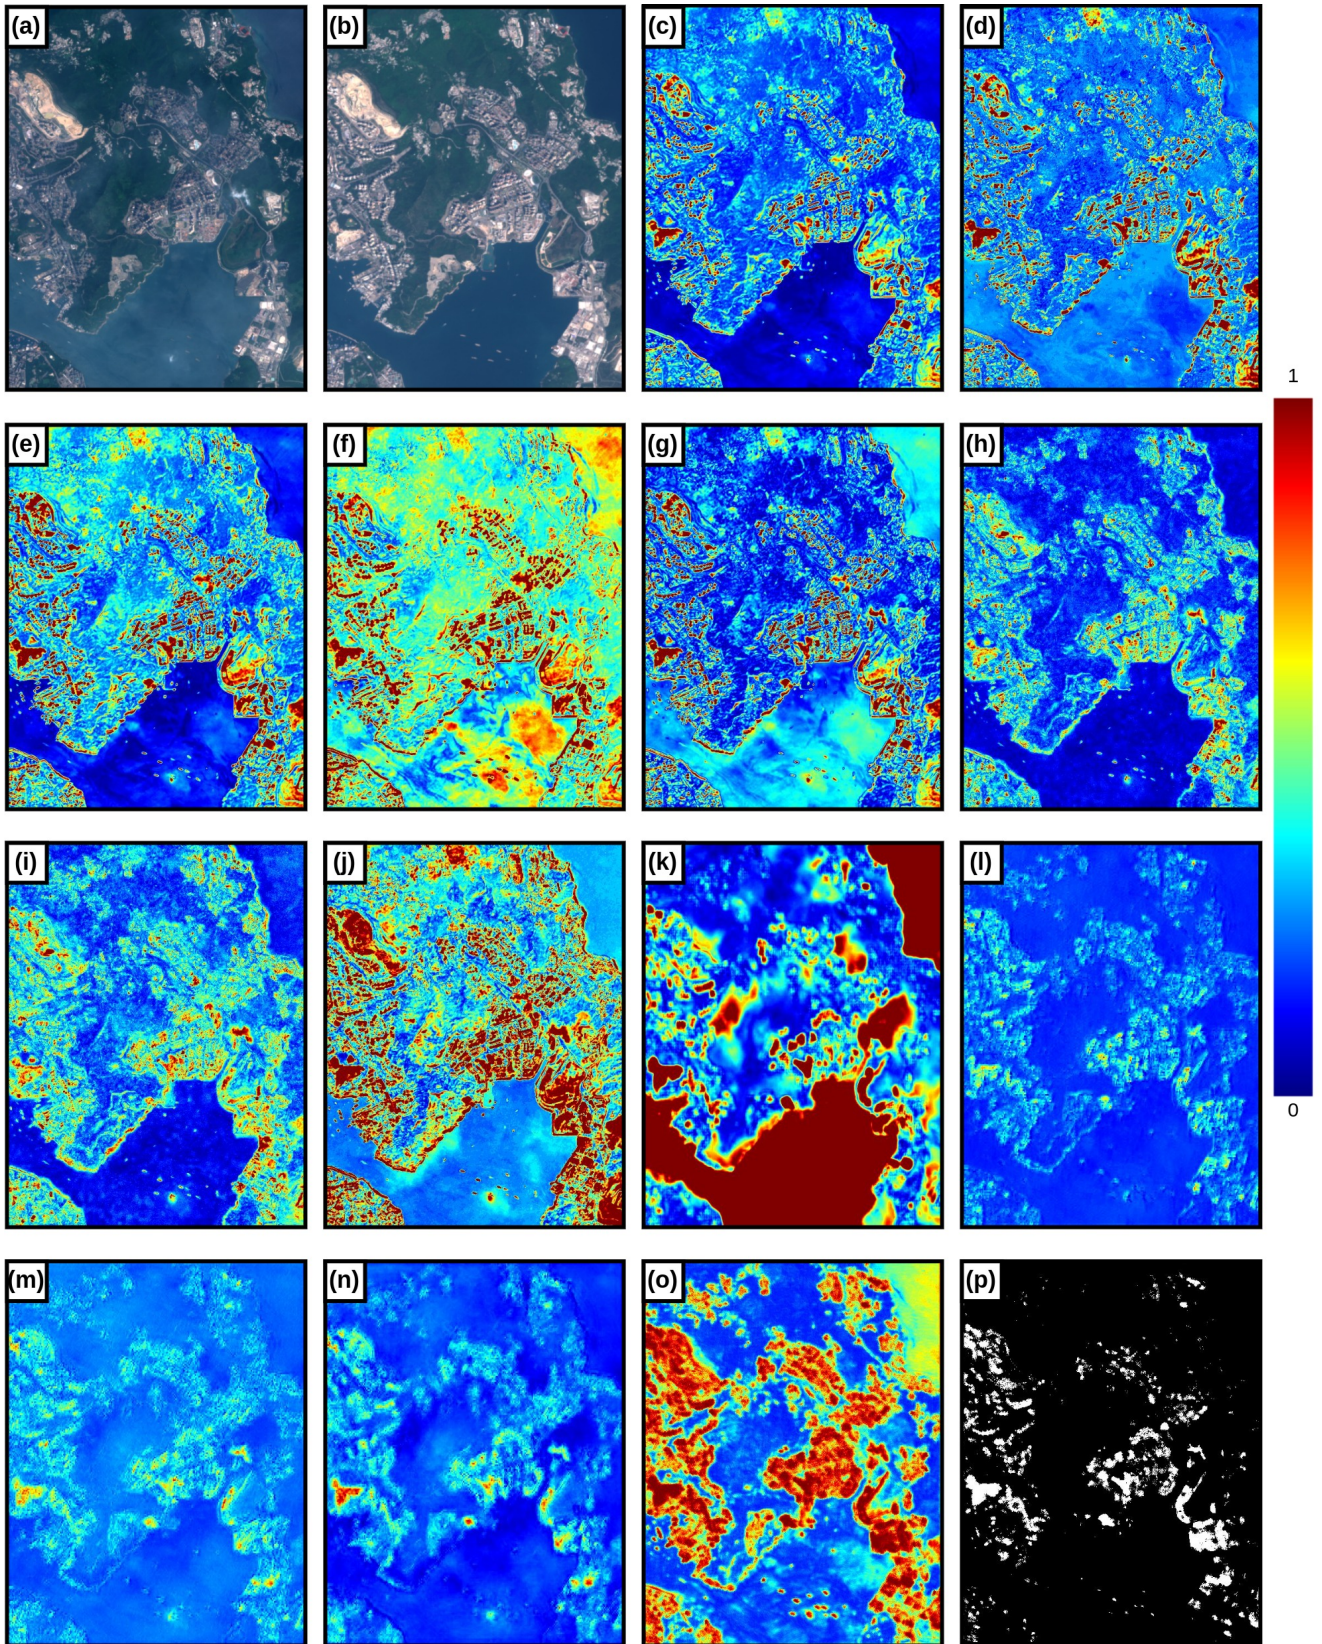

**Figure 11.** Change probability map (i.e., difference image) of different CD methods for hongkong image pair in OSCD dataset. (a) Pre-change image. (b) Post-change image. (c) CVA. (d) DPCA. (e) ImageDiff. (f) ImageRatio. (g) ImageRegr. (h) IRMAD. (i) MAD. (j) PCDA. (k) DeepCVA. (l) UNet. (m) SeCo-Rand. (n) SeCo-Pre. (o) “Deep metric learning CD” (ours). (p) Groud-truth change mask.

#### 4. Limitations and Future Work

Since the proposed TTT-CD approach optimizes network parameters for each MT-RSI separately at test-time to estimate the change probability map, the inference time (testing time) of the proposed method is higher when compared with SOTA supervised, self-supervised, and unsupervised methods. For example, the average inference time of a supervised method: SeCo [2], and an unsupervised method: D-CVA [3] are about 1.9 s and 8.2 s for an MT-RSI with a spatial resolution of  $1154 \times 740$ , respectively. In comparison, the proposed method takes about 18.4 s to iteratively estimate the change probability map of the same test MT-RSI. We will address this limitation of the proposed TTT-CD in our future work.

## References

- [1] Caye Daudt, R., Le Saux, B., Boulch, A., Gousseau, Y.: Urban change detection for multispectral earth observation using convolutional neural networks. In: IEEE International Geoscience and Remote Sensing Symposium (IGARSS) (July 2018) **1, 2**
- [2] Mañas, O., Lacoste, A., Giro-i Nieto, X., Vazquez, D., Rodriguez, P.: Seasonal contrast: Unsupervised pre-training from uncurated remote sensing data. arXiv preprint arXiv:2103.16607 (2021) **13**
- [3] Saha, S., Bovolo, F., Bruzzone, L.: Unsupervised deep change vector analysis for multiple-change detection in vhr images. *IEEE Transactions on Geoscience and Remote Sensing* **57**(6), 3677–3693 (2019). <https://doi.org/10.1109/TGRS.2018.2886643> **13**
